# Supplementary material
Source: Springer Nature journal article supplement (https://www.springermedizin.de/resource/supplementary/13045_2008_15_MOESM2_ESM.pdf/9660480)

Fig. (2)

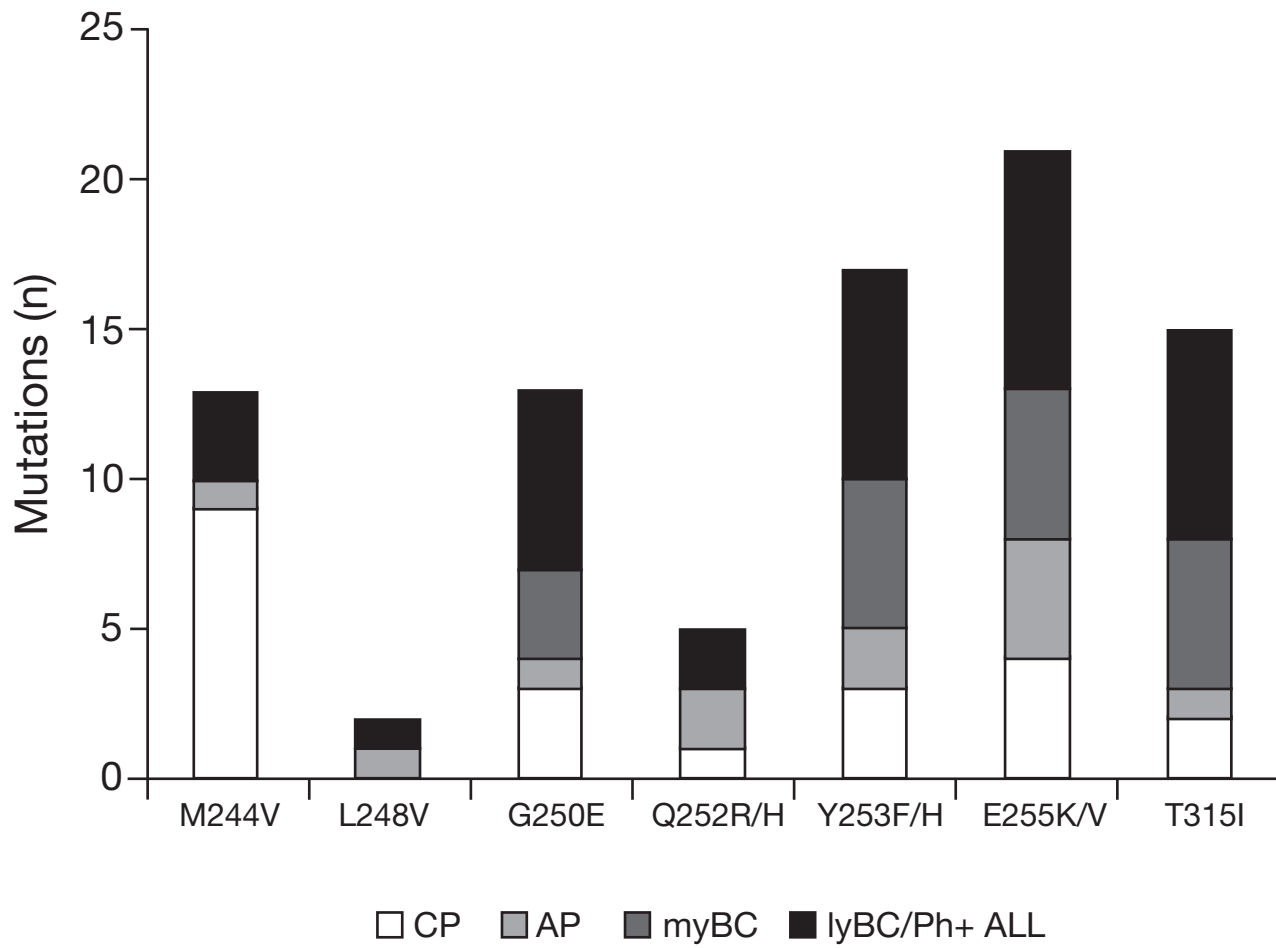

Supplement: MOESM2 [file 9660480]
